# Supplementary material for: VvPL15 Is the Core Member of the Pectate Lyase Gene Family Involved in Grape Berries Ripening and Softening
Source: MDPI journal article supplement (doi:10.3390/ijms24119318), 2023-05-26
Supplement: s1 [file s1]

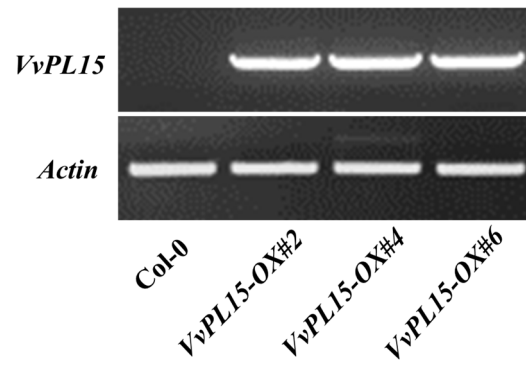

**Figure S1.** Identification of the *VvPL15-OX* Arabidopsis seedlings at the DNA level.

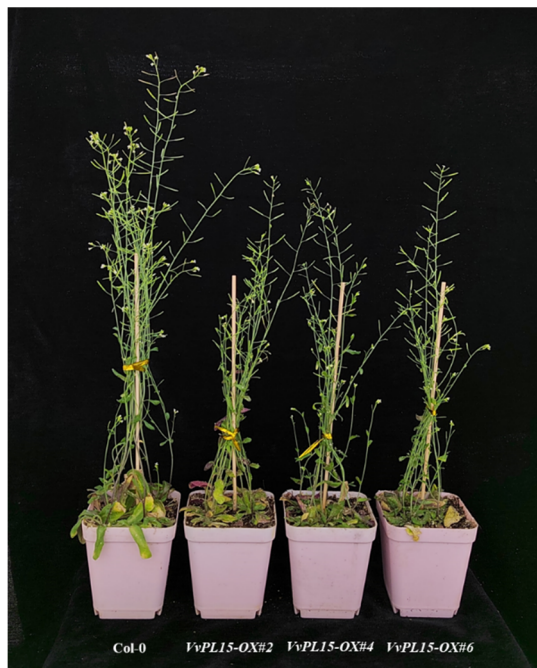

**Figure S2.** The phenotype of *VvPL15* overexpression.

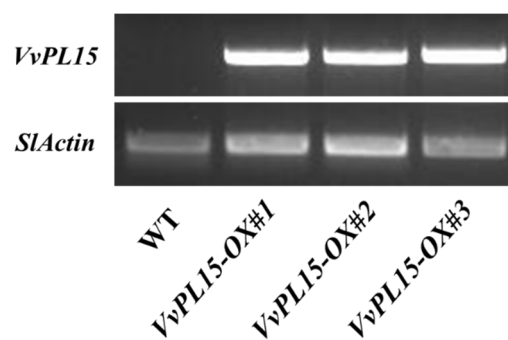

**Figure S3.** Identification of the *VvPL15-OX* tomato at the DNA level.

**Table S1. Number of cis-elements occurrence in *VvPL* gene promoters.**

| Gene name     | Genome v2.1       | TGA-<br>element | P-box | ERE | ABRE | MYB | TCA-<br>element | CGTCA-<br>motif | W-box | LTR | MBS |
|---------------|-------------------|-----------------|-------|-----|------|-----|-----------------|-----------------|-------|-----|-----|
| <i>VvPL1</i>  | VIT_01s0026g01670 | 0               | 1     | 3   | 4    | 8   | 1               | 2               | 2     | 3   | 2   |
| <i>VvPL2</i>  | VIT_01s0026g01680 | 1               | 1     | 4   | 5    | 6   | 1               | 0               | 0     | 0   | 1   |
| <i>VvPL3</i>  | VIT_01s0137g00240 | 1               | 1     | 0   | 9    | 5   | 1               | 6               | 1     | 0   | 2   |
| <i>VvPL4</i>  | VIT_05s0051g00590 | 0               | 1     | 4   | 9    | 6   | 0               | 2               | 2     | 1   | 0   |
| <i>VvPL5</i>  | VIT_07s0005g05520 | 0               | 0     | 1   | 11   | 9   | 1               | 2               | 0     | 0   | 0   |
| <i>VvPL6</i>  | VIT_08s0007g04820 | 0               | 0     | 3   | 3    | 3   | 1               | 0               | 1     | 0   | 0   |
| <i>VvPL7</i>  | VIT_08s0040g02740 | 0               | 0     | 3   | 0    | 3   | 1               | 2               | 1     | 0   | 0   |
| <i>VvPL8</i>  | VIT_10s0116g01160 | 0               | 0     | 5   | 1    | 3   | 0               | 0               | 0     | 0   | 0   |
| <i>VvPL9</i>  | VIT_13s0019g04900 | 2               | 2     | 7   | 0    | 0   | 1               | 0               | 1     | 0   | 0   |
| <i>VvPL10</i> | VIT_13s0019g04910 | 0               | 1     | 8   | 0    | 2   | 0               | 0               | 1     | 0   | 1   |
| <i>VvPL11</i> | VIT_14s0108g00030 | 0               | 0     | 0   | 2    | 4   | 0               | 0               | 0     | 0   | 0   |
| <i>VvPL12</i> | VIT_14s0219g00230 | 0               | 0     | 2   | 3    | 7   | 0               | 6               | 1     | 1   | 1   |
| <i>VvPL13</i> | VIT_16s0039g00260 | 0               | 1     | 2   | 2    | 6   | 1               | 0               | 0     | 1   | 1   |
| <i>VvPL14</i> | VIT_17s0000g05740 | 0               | 1     | 1   | 4    | 9   | 0               | 0               | 1     | 0   | 1   |
| <i>VvPL15</i> | VIT_17s0000g09810 | 2               | 0     | 1   | 0    | 2   | 4               | 4               | 2     | 0   | 0   |
| <i>VvPL16</i> | VIT_19s0014g00510 | 0               | 0     | 2   | 0    | 7   | 0               | 0               | 1     | 3   | 0   |

**Table S2. Primers used in this study.**

| Gene name                   | Sequence (5' to 3')     |
|-----------------------------|-------------------------|
| <i>VvActin</i> -F (qRT-PCR) | GAGATTCCGTTGTCCAGAAGTC  |
| <i>VvActin</i> -R (qRT-PCR) | CAATGTTGCCATAGAGGTCCTT  |
| <i>VvPL1</i> -F (qRT-PCR)   | TTCACAACGCAAAAGGCTAGC   |
| <i>VvPL1</i> -R (qRT-PCR)   | GCATGGCGTAATGTTCCCTTC   |
| <i>VvPL2</i> -F (qRT-PCR)   | AATCCTAAGCCTGGAACCTTACG |
| <i>VvPL2</i> -R (qRT-PCR)   | GTTTTGTCACTGGTCACCATCAG |

|                            |                                              |
|----------------------------|----------------------------------------------|
| <i>VvPL3</i> -F (qRT-PCR)  | GTATGAAGGTGAAGACAAGTGC                       |
| <i>VvPL3</i> -R (qRT-PCR)  | TCTTCGTTTCTTCTTTACCCCA                       |
| <i>VvPL4</i> -F (qRT-PCR)  | GTCTAGAGAGAGAGCTTTTCGAC                      |
| <i>VvPL4</i> -R (qRT-PCR)  | CAGCCATTGATGAGTTGTTTGA                       |
| <i>VvPL5</i> -F (qRT-PCR)  | CCTTTATGGATCGTGTTCAAGC                       |
| <i>VvPL5</i> -R (qRT-PCR)  | GATAAACTGGATGGTGATGCAC                       |
| <i>VvPL6</i> -F (qRT-PCR)  | GTCACAGCGATTTCGTATGTGC                       |
| <i>VvPL6</i> -R (qRT-PCR)  | TGACCACGTGTATATAGCCGC                        |
| <i>VvPL7</i> -F (qRT-PCR)  | TGGTGATAGATGTATTCGGGTG                       |
| <i>VvPL7</i> -R (qRT-PCR)  | CAGCTGCCTTCTCTGTAAGATA                       |
| <i>VvPL8</i> -F (qRT-PCR)  | CCACGTGGTGAATAACGATTAC                       |
| <i>VvPL8</i> -R (qRT-PCR)  | CTCCATCTTTTGCATCCATACG                       |
| <i>VvPL9</i> -F (qRT-PCR)  | CCACGTGGTGAATAACGATTAC                       |
| <i>VvPL9</i> -R (qRT-PCR)  | CTCCATCTTTTGCATCCATACG                       |
| <i>VvPL10</i> -F (qRT-PCR) | CAGAGCCACTCTCAACCTCAAT                       |
| <i>VvPL10</i> -R (qRT-PCR) | ACAGAGAGCACTTGTCTTCTCG                       |
| <i>VvPL11</i> -F (qRT-PCR) | TCCAGGGCGATAAGATCATGC                        |
| <i>VvPL11</i> -R (qRT-PCR) | GTTGACAACATGGACGAAGCC                        |
| <i>VvPL12</i> -F (qRT-PCR) | GTGCTGACCCTACCATCAACA                        |
| <i>VvPL12</i> -R (qRT-PCR) | ATGCCTCCACTCACTTTCTGG                        |
| <i>VvPL13</i> -F (qRT-PCR) | GTTGCATCCTCACAAATTTGGA                       |
| <i>VvPL13</i> -R (qRT-PCR) | CTGAACCAGTTGTTTGAGATGG                       |
| <i>VvPL14</i> -F (qRT-PCR) | AATTTTCAGGACTATGCATGGC                       |
| <i>VvPL14</i> -R (qRT-PCR) | CAAGCACACAATCAGCTAGTTT                       |
| <i>VvPL15</i> -F (qRT-PCR) | TGAACTCCTTCAAGACCATTGA                       |
| <i>VvPL15</i> -R (qRT-PCR) | ACCGTCTGATATCGTCCTAAAC                       |
| <i>VvPL16</i> -F (qRT-PCR) | ACGGACTCATTGATGCAGTGT                        |
| <i>VvPL16</i> -R (qRT-PCR) | TCATCACTATGCCCCATGAGC                        |
| <i>VvPL15</i> -F (pRI)     | ttgatacatatgccgctgacATGGCTAGCTCTTCACTTTCCCT  |
| <i>VvPL15</i> -R (pRI)     | agagttgttgattcagaattcTCAGCATCGAGAACCTTTCTTGC |
| <i>VvPL15</i> -F (TRV)     | gtgagtaaggttaccgaattcATGCAGTCATCCAAGATGAGCC  |
| <i>VvPL15</i> -R (TRV)     | cgtgagctcggtaccggatccAGATATGGCTCCCACCAAAGATG |
| <i>AtActin2</i> -F         | ATCAGCCGTTTTGAATCTCC                         |
| <i>AtActin2</i> -R         | CAATCTAACTTCAACAGTTC                         |

---
